# Supplementary material for: A simulation-based evaluation of methods for estimating census population size of terrestrial game species from genetically-identified parent-offspring pairs
Source: PeerJ journal article supplement (doi:10.7717/peerj.15151), 2023-04-12

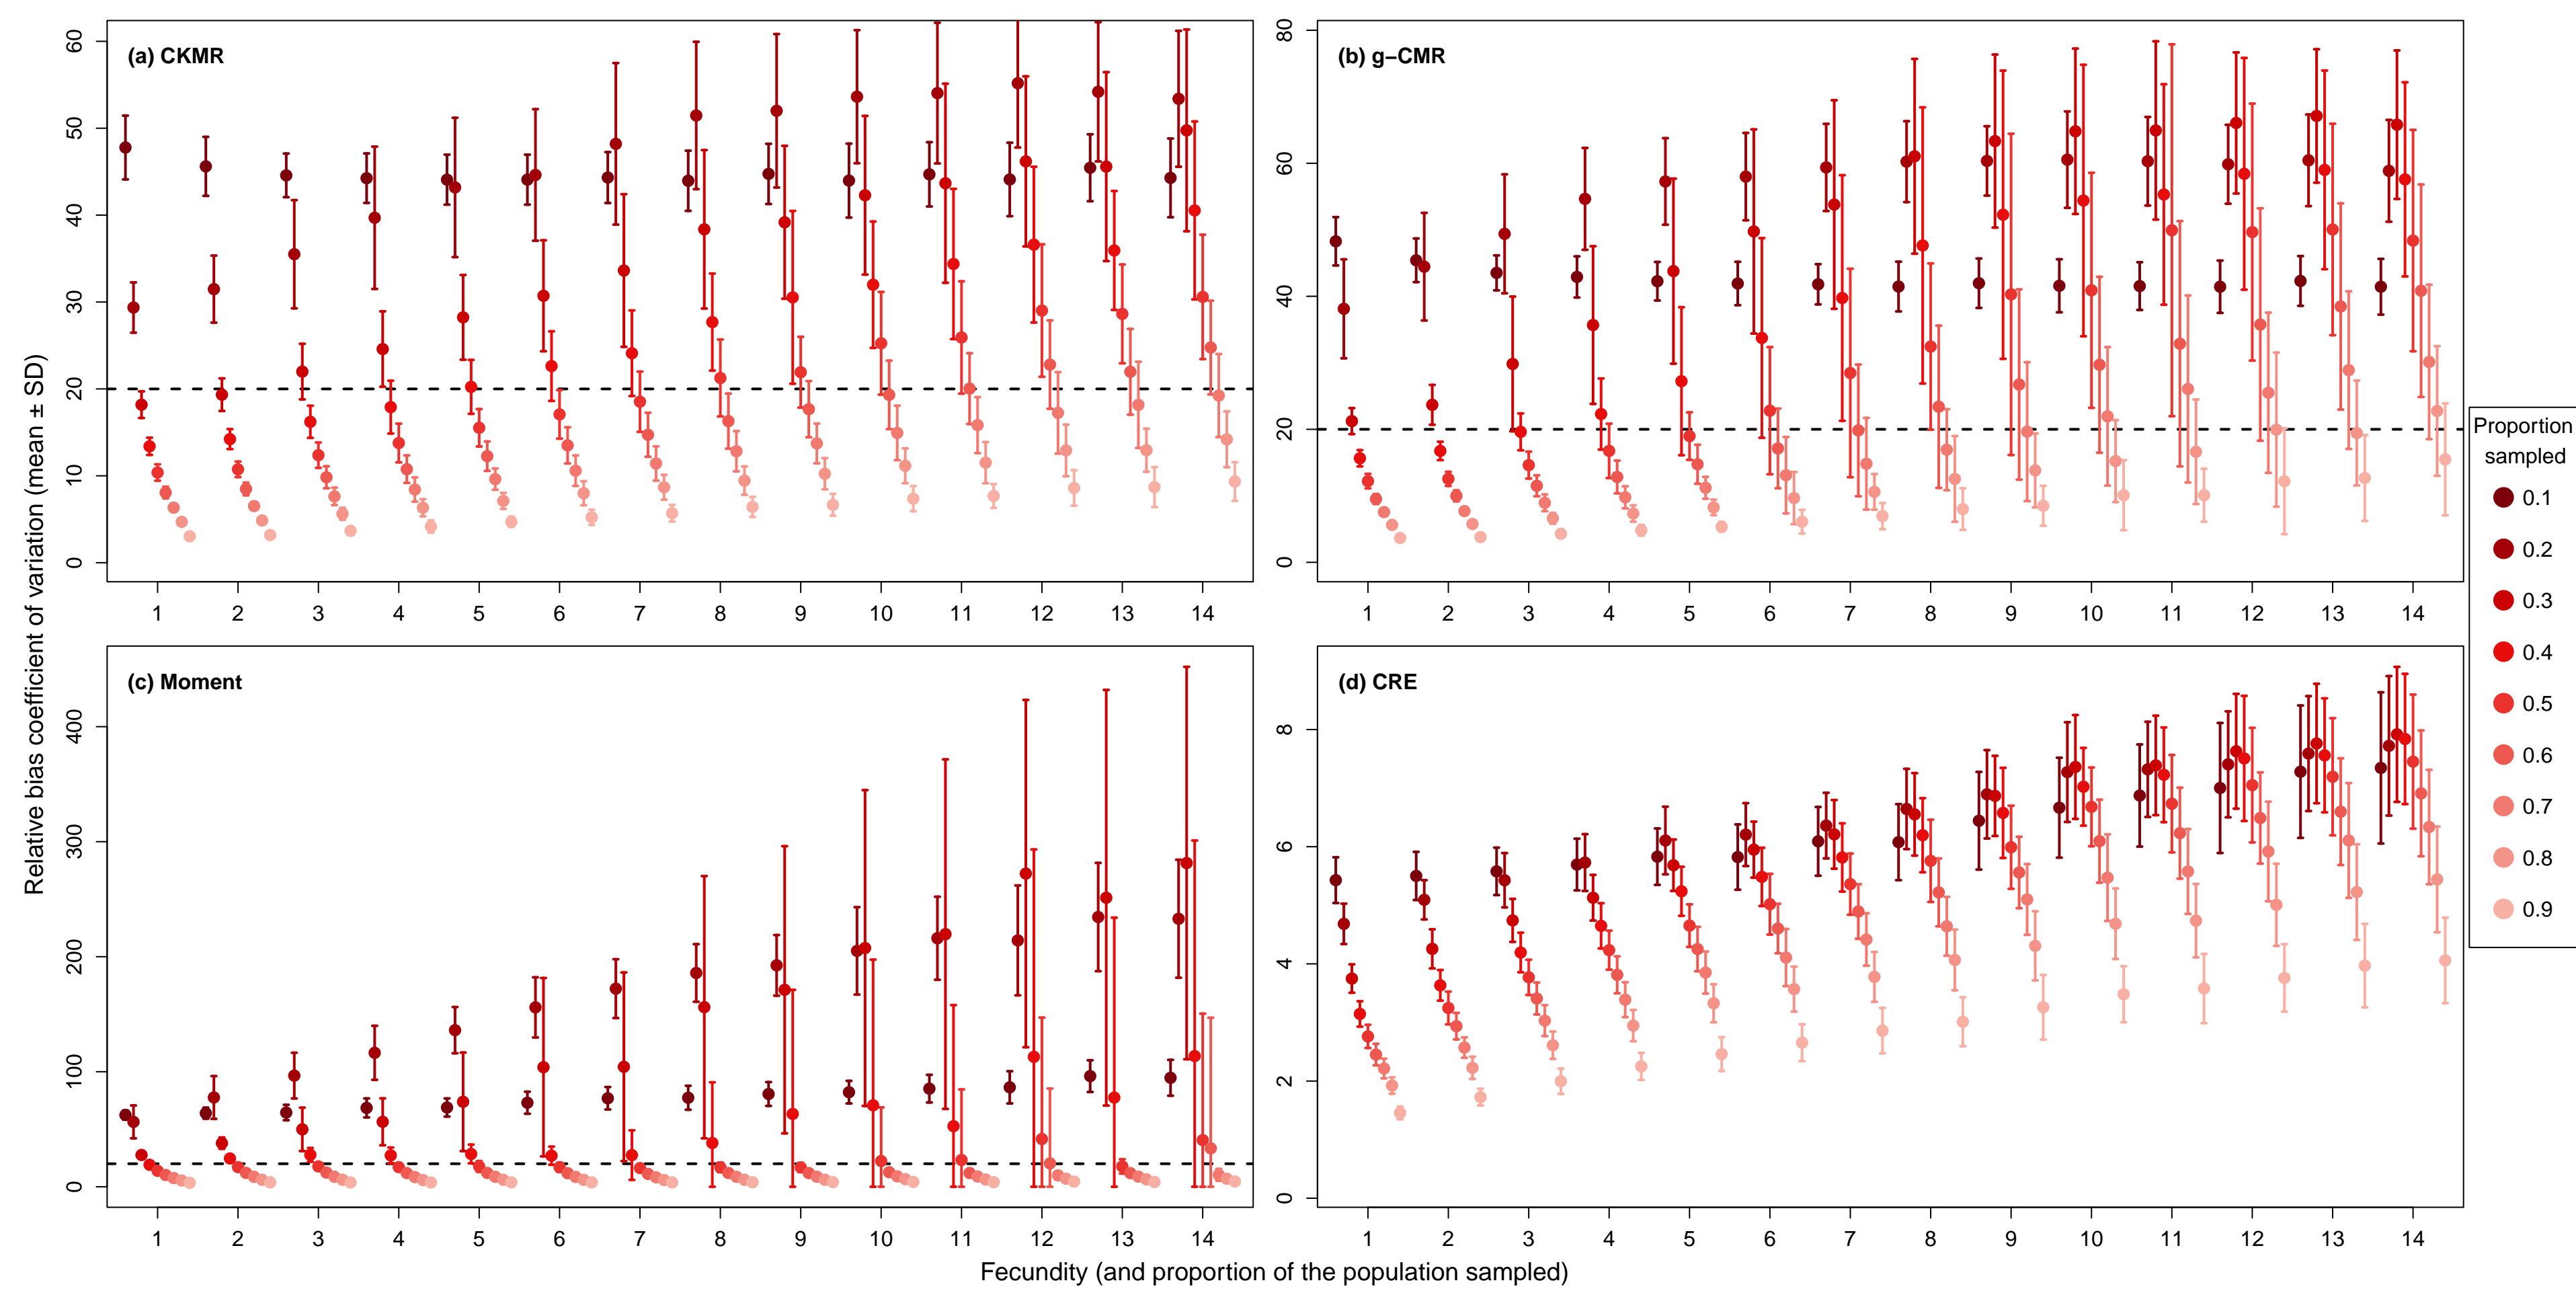

Supplement: FigS2.pdf [file FigS2.pdf]
